# Supplementary material for: Study of Na+/H+ exchange-mediated pHi regulations in neuronal soma and neurites in compartmentalized microfluidic devices
Source: Royal Society of Chemistry journal article supplement (doi:10.1039/b918440f), 2009-12-14
Supplement: b918440f.pdf [file b918440f.pdf]

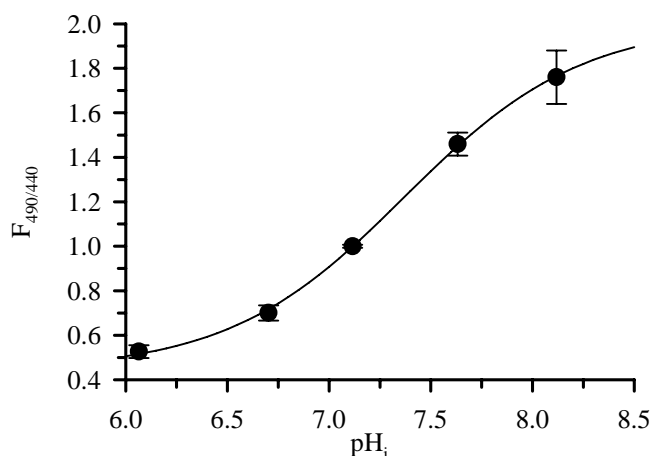

### Supplemental Figure 1

To calculate the inherent variability in BCECF method, we plotted the means  $\pm$  SD (standard deviation) from a typical in-situ calibration that is performed at the end of each experiment. Because the high  $K^+$ /nigericin technique equilibrates  $H^+$  across the plasma membrane, the  $[H^+]$  should be identical in all cells. The intracellular differences in the observed F490/F440 ratios would be a reflection of the inherent error in the BCECF method. The data was fit to a non-linear curve. At pH 7.116, SD of the F490/F440 ratios would give a calculated variability of +0.0075 and -0.0095 pH units. As seen in the figure, the variability in the BCECF method is considerably higher at alkaline pHs. However, this is outside the range of pH<sub>i</sub> relevant to our study.
